# Supplementary material for: Phase-specific bioactivity and altered Ostwald ripening pathways of calcium carbonate polymorphs in simulated body fluid
Source: PubMed Central journal article supplement — RSC Adv. 2019 Jun 24;9(32):18232–44. doi: 10.1039/c9ra01473j (PMC9064690; doi:10.1039/c9ra01473j), 2019-06-24
Supplement: RA-009-C9RA01473J-s001.pdf [file RA-009-C9RA01473J-s001.pdf]

ESI – Myszka et al.

## ***Electronic Supplemental Information for***

# **Phase-specific bioactivity and altered Ostwald ripening pathways of calcium carbonate polymorphs in simulated body**

**Barbara Myszka<sup>a</sup>, Martina Schüßler<sup>b</sup>, Katrin Hurle<sup>c</sup>, Benedikt Demmert<sup>b</sup>, Rainer Detsch<sup>a</sup>, Aldo R. Boccaccini<sup>a,d</sup>, and Stephan E. Wolf<sup>b,d,\*</sup>**

a. Institute of Biomaterials, Friedrich-Alexander-University of Erlangen-Nuremberg, Cauerstrasse 6, 91058 Erlangen, Germany.

b. Institute for Glass and Ceramics, Friedrich-Alexander-University Erlangen-Nuremberg, Martensstraße 5, 91058 Erlangen, Germany.

c. GeoZentrum Nordbayern – Mineralogy, Friedrich-Alexander-University Erlangen-Nuremberg, Schlossgarten 5a, 91054 Erlangen, Germany.

d. Interdisciplinary Center for Functional Particle Systems (FPS), Friedrich-Alexander-University Erlangen-Nuremberg, 91058 Erlangen, Germany.

\* To whom correspondence should be addressed: [stephan.e.wolf@fau.de](mailto:stephan.e.wolf@fau.de)

## Section A — Calcite

### Phase purity of commercial calcite

The phase purity of the commercially supplied calcite is documented by XRD (Fig. A1-A), with the highest intensity representing (104) at  $2\theta = 29.3^\circ$ . All other peaks also belong to calcite, i.e. (113), (116), (018), (202), (110), (012), (1010) and (215). Thermal analysis of the powder (Fig. A1-B) showed only weight loss above  $700^\circ\text{C}$  which relates to thermal decomposition of calcium carbonate; and it corresponds also to the endothermic peak in the DTA curve. Prior to this event, no weight loss or other endo-/exothermic events can be identified which assures the absence of organic substances or a potentially amorphous phase. The overall weight loss is 43–44% which is in agreement with the theoretical loss of 44 wt% [1]. The ATR/FT-IR spectrum of the powder (Fig. A1-C) shows the characteristic absorption bands of calcite: the in-plane band ( $\nu_4$ ) at  $711\text{ cm}^{-1}$ , the out plane band ( $\nu_2$ ) at  $876\text{ cm}^{-1}$ , and an anti-symmetry stretch ( $\nu_3$ ) at  $1402\text{ cm}^{-1}$  [2]. It is worth mentioning that sharp bands at  $876\text{ cm}^{-1}$  confirm phase-pure calcite because the out-of-plane band ( $\nu_2$ ) of aragonite is at  $854\text{ cm}^{-1}$  and for vaterite at  $867\text{ cm}^{-1}$  [3]. Raman spectroscopy studies also showed the characteristic bands of calcite and no bands of a second polymorph (Fig. A1-D). The single band at  $1085\text{ cm}^{-1}$  is related to internal modes that originates from the  $\nu_1$  symmetric stretching mode of the carbonate ion. The  $\nu_4$  in-plane-bending mode of carbonate can be found at  $711\text{ cm}^{-1}$ . Bands below  $300\text{ cm}^{-1}$  correspond to translational and rotational lattice modes [4].

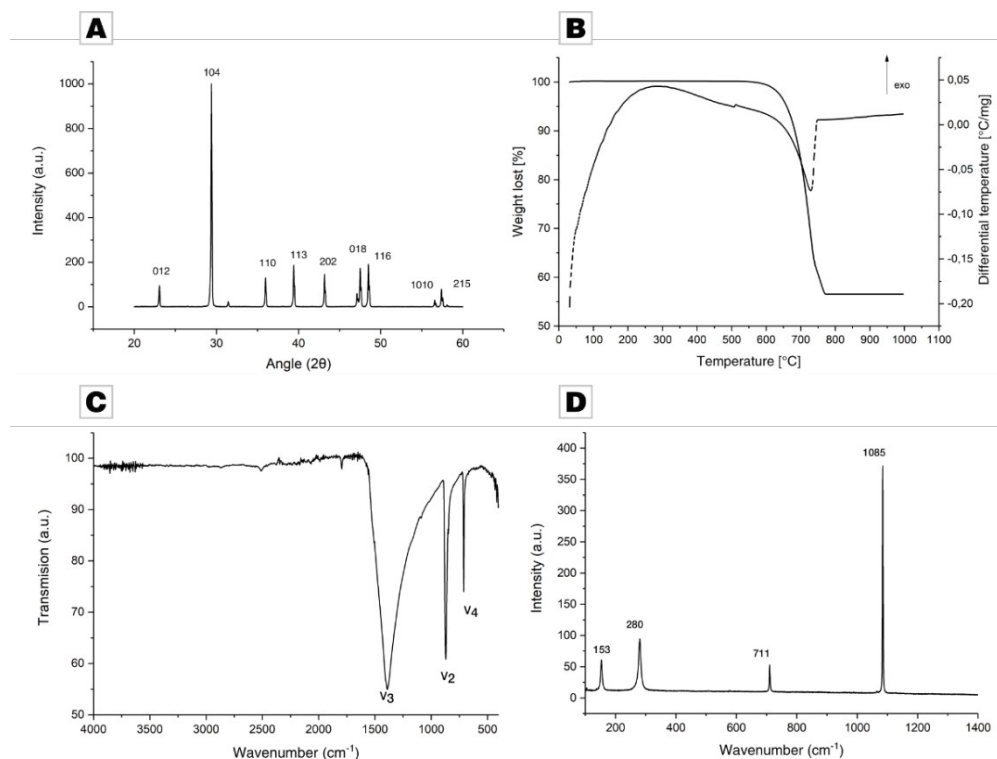

**Figure A1. Characterization of commercial calcite.** (A) X-ray diffraction, (B) TGA/DTA analysis, (C) ATR/FT-IR spectroscopy, and (D) Raman spectroscopy.

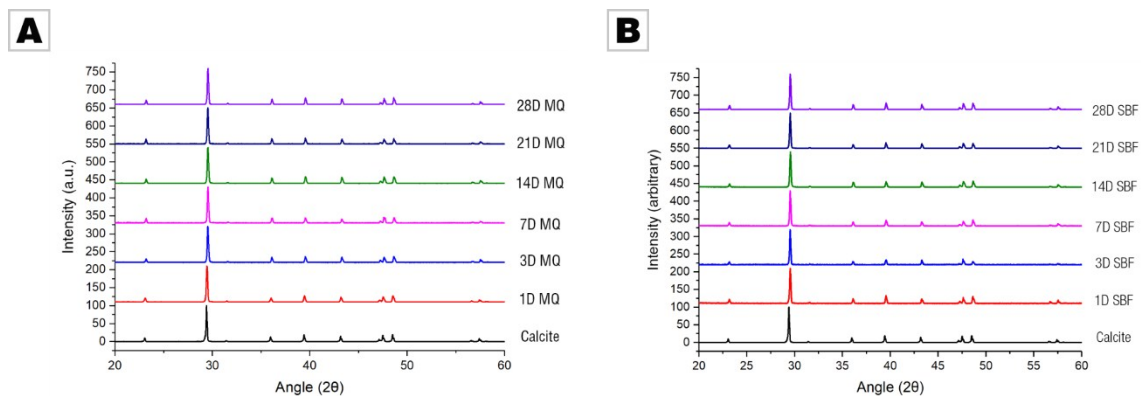

**Figure A2.** Evolution of X-ray diffractograms of calcite during incubation (A) in water and (B) in SBF for a time period of up to 28 d. Throughout, only reflections from calcite are present.

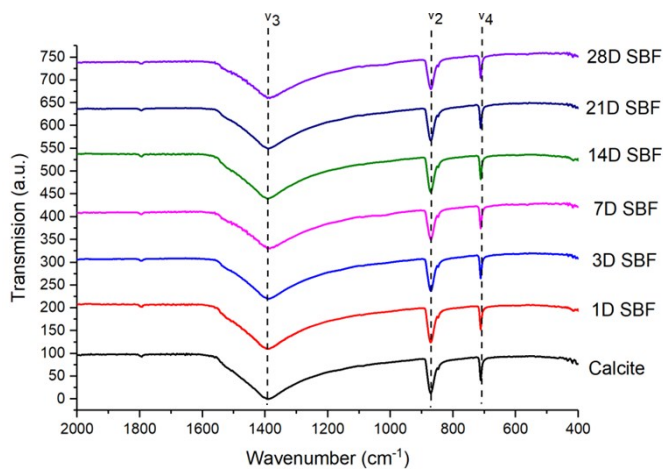

**Figure A3.** Evolution of ATR/FT-IR spectra of calcite during incubation in SBF for a time period of up to 28 d. No characteristic phosphate bands are present even after 4 weeks.

## Section B — Aragonite

### Phase purity of synthesized aragonite

The phase purity of aragonite was assured by XRD (Fig. B1-A), where the analysis shows that all the diffraction peaks are in accordance with the standard data PDF No. 00-041-1475 [5]. Thermal analysis of the precipitated powder (Fig. B1-B) showed a first weight loss of  $\sim 0.5$ – $1.0$  wt% below  $100$  °C which is due to the elimination of physically adsorbed water. The second weight loss of  $1.0$ – $2.0$  wt% at  $240$ – $400$  °C is due to the elimination of occluded water. The thermal decomposition at the temperature range  $550$ – $750$  °C; the overall weight loss and the absence of further endo- or exothermic events indicates that only one phase pure of organic impurities is present. The ATR/FTIR spectrum of the sample (Fig. B1-C) features the anti-symmetry stretching vibration ( $\nu_3$ ) at  $1460$   $\text{cm}^{-1}$ , a symmetric carbonate stretching vibration ( $\nu_1$ ) at  $1084$   $\text{cm}^{-1}$  and a carbonate out-of-plane bending ( $\nu_2$ ) vibration at  $854$   $\text{cm}^{-1}$  which are all characteristic of the aragonite structure [6]. In aragonite, the symmetric stretching vibration ( $\nu_1$ ) is active both in Raman and IR whereas in the case of calcite it is only Raman-active. Often, this band at  $\sim 1080$   $\text{cm}^{-1}$  is used to discriminate aragonite from mixtures of aragonite and calcite [7]. The pair of bands at ca.  $713$  and  $700$   $\text{cm}^{-1}$  are assigned to the in-plane bending modes ( $\nu_4$ ) which are also characteristic for aragonite [6,8]. No characteristic vibrational bands belonging to calcite or vaterite were detected, which further demonstrate that the powder obtained is pure aragonite. The Raman spectrum presents (Fig. B1-D) the strongest line in the  $\nu_1$  symmetric stretch of  $\text{CO}_3^{2-}$  ion at  $\sim 1084$   $\text{cm}^{-1}$ . A pair of bands presented at  $700$  and  $704$   $\text{cm}^{-1}$  are characteristic of aragonite [9]. Bands below  $300$   $\text{cm}^{-1}$  corresponded to translational and rotational lattice modes [10].

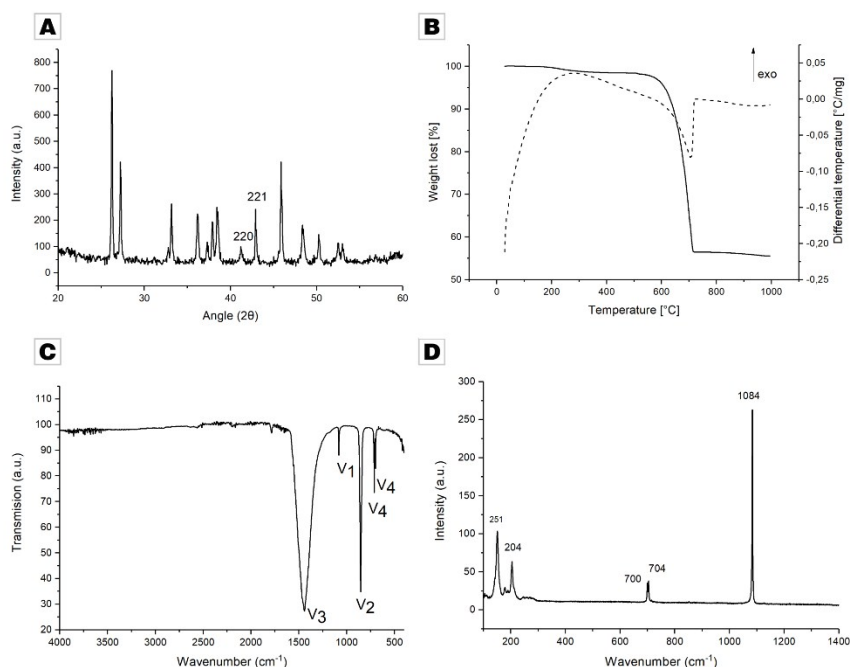

**Figure B1. Characterization of synthesized aragonite.** (A) X-ray diffraction, (B) TGA/DTA analysis, (C) ATR/FT-IR spectroscopy, and (D) Raman spectroscopy.

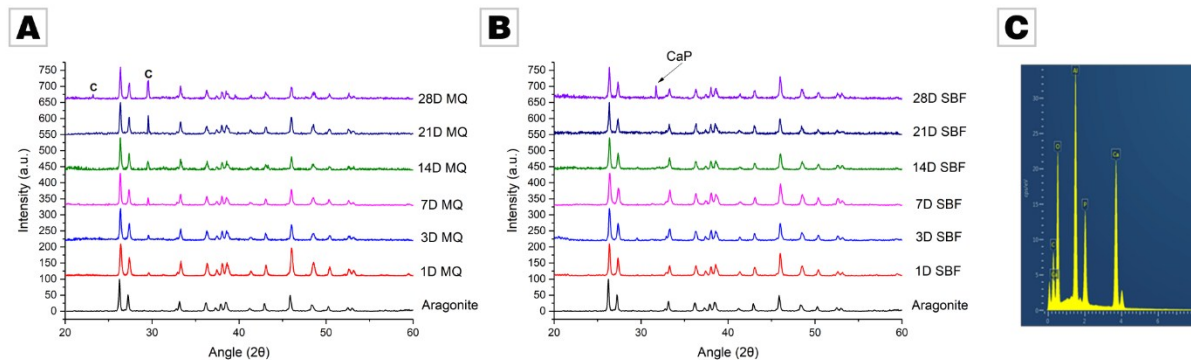

**Figure B2. Evolution of X-ray diffractograms of aragonite before/during incubation (A) in water and (B) in SBF for a time period of up to 28 d.** Only after 28 d, a small peak of calcium phosphate is present. No calcite appears. (C) EDS of spherulitic precipitates, as marked in Fig. 2-B.

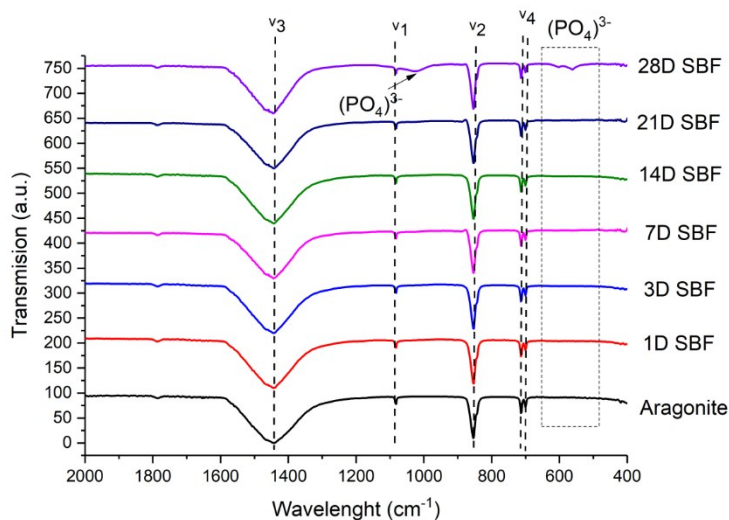

**Figure B3. Evolution of ATR/FT-IR spectra of aragonite before/during incubation in SBF for a time period of up to 28 d.** Only after 28 d, a small peak of calcium phosphate is present. No calcite appears; however, after 28 days of incubation absorption bands typical for phosphate groups at 1029, 601 and 563  $\text{cm}^{-1}$  appear additionally to the bands of aragonite.

**Table B4. Rietveld refinement for aragonite powder after 1–28 days of immersion into MilliQ water.**

|                | <b>wt% calcite</b> | <b>wt% aragonite</b> |
|----------------|--------------------|----------------------|
| <b>1 day</b>   | 3                  | 97                   |
| <b>3 days</b>  | 4                  | 96                   |
| <b>7 days</b>  | 4                  | 96                   |
| <b>14 days</b> | 8                  | 92                   |
| <b>21 days</b> | 11                 | 89                   |
| <b>28 days</b> | 18                 | 82                   |

## Section C — Vaterite

### Phase purity of synthesized vaterite

Vaterite was synthesized by a double decomposition technique and its phase purity was documented by XRD (Fig. C1-A) which is in agreement with the standard data PDF NO. 00-033-0268 [5]. The precipitated powder was characterized by TG-DTA analysis (Fig. C1-B) where the first slow weight loss shows a total of 0.5 wt% which we attribute to the evaporation of the physically adsorbed water [11]. The second weight loss of 1.0–1.5 wt% at 150–450 °C is due to the elimination of occluded water in vaterite, similar to the observations made in case of aragonite. The last weight lost in the temperature of 500–800 °C (~42.0 wt%) is due to decomposition of  $\text{CaCO}_3$  to  $\text{CaO}$  and  $\text{CO}_2$  and is accompanied by an endothermic peak at 715 °C in the DTA curve. The TGA/DTA analysis gave no evidence for a second, e.g. amorphous, phase and assured the absence of organic impurities. ATR/FTIR analysis (Fig. C1-C) only showed absorption bands characteristic of vaterite: 1090  $\text{cm}^{-1}$  ( $\nu_1$  symmetric carbonate stretching vibration), 867  $\text{cm}^{-1}$  ( $\nu_2$  a carbonate out-of-plane bending), 1409  $\text{cm}^{-1}$  ( $\nu_3$  anti-symmetry stretch) and 736  $\text{cm}^{-1}$  ( $\nu_4$  in-plane bending). No bands belonging to aragonite at 713 and 700  $\text{cm}^{-1}$ , or calcite at 711 and 876  $\text{cm}^{-1}$  were detected, further corroborating that ellipsoidal polycrystals are vaterite [8,12]. Raman spectroscopy studies also showed only bands characteristic of vaterite (Fig. C1-D). [10] Raman bands at 1073 and 1089  $\text{cm}^{-1}$  correspond to the internal mode that derives from the  $\nu_1$  symmetric stretching mode of the carbonate ion. At 738–750  $\text{cm}^{-1}$  the  $\nu_4$  in-plane bending mode of carbonate can be found. Samples exhibit bands below 300  $\text{cm}^{-1}$ , which correspond to translational and rotational lattice modes.

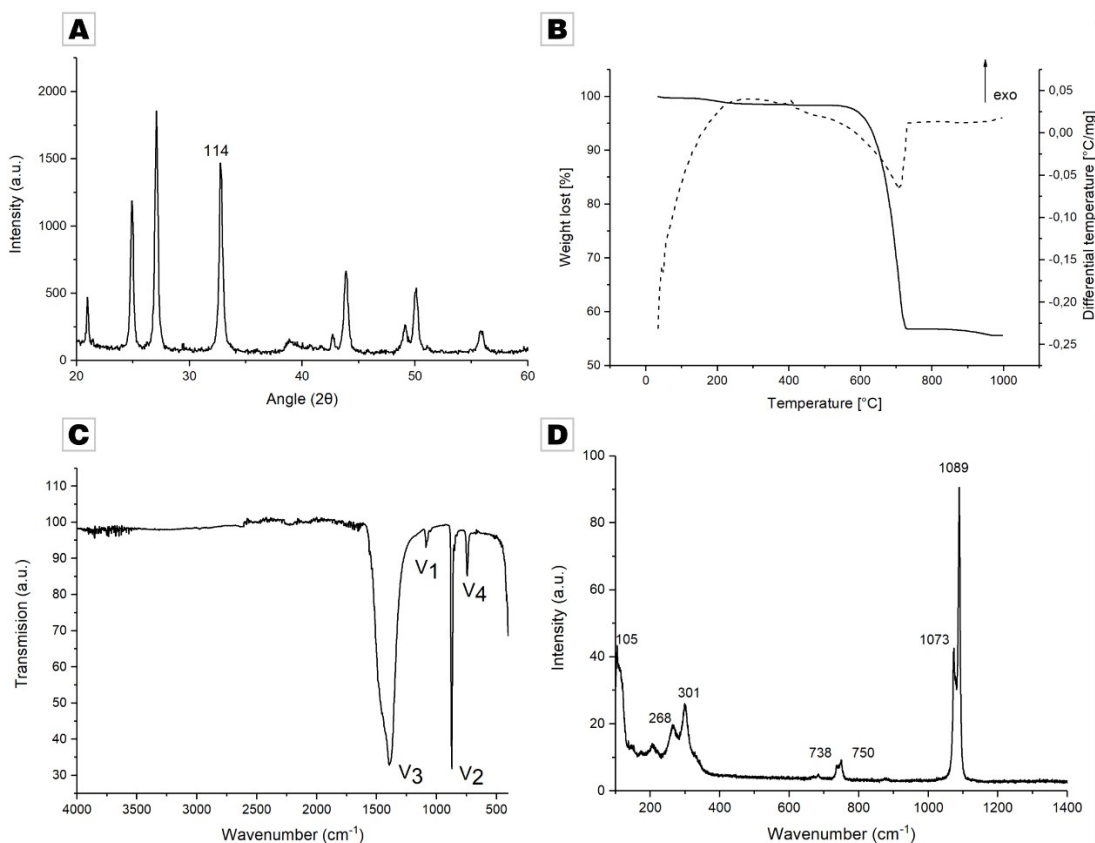

**Figure C1. Characterization of synthesized vaterite.** (A) X-ray diffraction, (B) TGA/DTA analysis, (C) ATR/FT-IR spectroscopy, and (D) Raman spectroscopy.

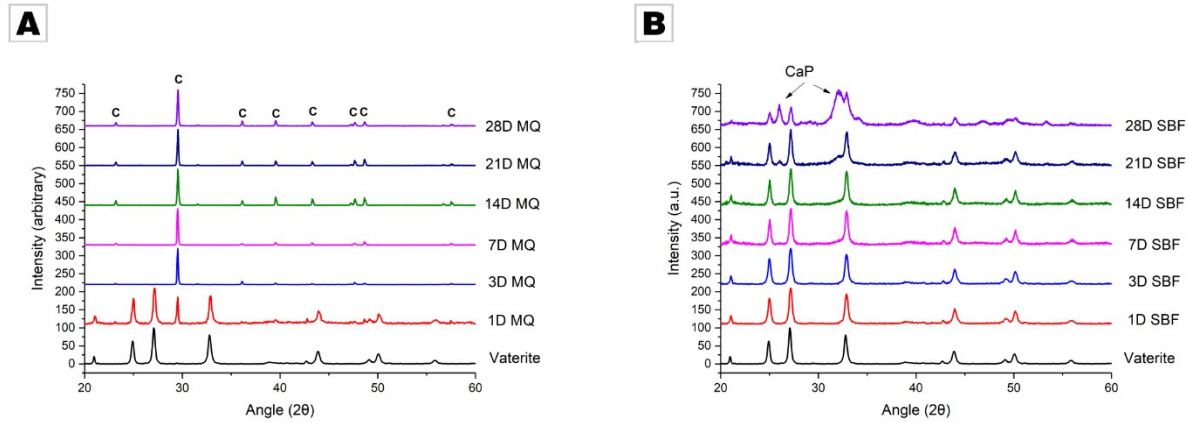

**Figure C2. Evolution of X-ray diffractograms of vaterite before/during incubation (A) in water and (B) in SBF for a time period of up to 28 d.** Only after 28 d, a small peak of calcium phosphate is present. Already after one day of incubation in water, calcite reflections appear additional to those of vaterite; after 3 d all vaterite reflection have vanished. In contrast, no calcite formation is detectable in SBF but calcium phosphate reflections are detectable after 28 d of incubation.

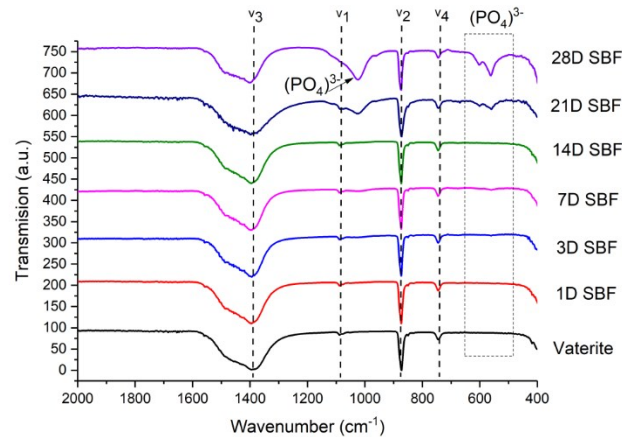

**Figure C3. Evolution of ATR/FT-IR spectra of vaterite before/during incubation in SBF for a time period of up to 28 d.** After 28 days of incubation, absorption bands typical for calcium phosphate at 1029, 601 and 563 cm<sup>-1</sup> appear additionally to the bands of vaterite.



## Section D – Amorphous Calcium Carbonate

### Phase purity of synthesized amorphous calcium carbonate (ACC)

The dried ACC precipitate is X-ray amorphous (Fig. D1-A); only diffuse scattering is observed which is common for ACC phase and was already previously reported.<sup>10,11</sup> TGA/DTA showed an initial weight loss up to 300–460 °C which is attributed to loss of water (~15.0 wt. %, Fig. D1-B). The initial dehydration step, below 120 °C, represents the loss of physisorbed water and the further loss between 120–460 °C is related to bound water. A remarkable exothermic DTA signal occurred at around  $390 \pm 3$  °C. Since this event was accompanied by only a minor increase in weight loss which is probably due to increased release of structural water, it denotes a recrystallization event of the ACC to a crystalline phase, probably calcite. Above 500 °C, dramatic weight loss occurs due to the decomposition of calcite into CaO and CO<sub>2</sub>.<sup>10</sup> At this point, the DTA curve exhibits an endothermic peak centered at 680 °C corresponding to the decarbonation of calcite.<sup>14</sup> The FT-IR spectrum (Fig. D1-C) presents the significant bands of ACC at 865 cm<sup>-1</sup> ( $\nu_2$ , the carbonate out-of-plane bending), and 1080 cm<sup>-1</sup> ( $\nu_1$ , the symmetric stretch in the non-centrosymmetric structure) and the splitting of the 1425 cm<sup>-1</sup> ( $\nu_3$ , the asymmetric stretch) also validate the formation of the ACC phase.<sup>11,12</sup> The absence of vibrations bands at 713 cm<sup>-1</sup> or 745 cm<sup>-1</sup>, which are characteristic of crystalline calcium carbonate phases, indicates that the mineralized product is pure ACC. The broad absorption bands between 3000 and 3600 cm<sup>-1</sup> (O–H stretching) and a sharper band at 1632 cm<sup>-1</sup> (O–H bending) can be assigned to structural water in ACC.<sup>12</sup> The Raman spectrum (Fig. D1-D) does not exhibit distinct bands in the spectrum region of 70–360 cm<sup>-1</sup> belonging to the lattice modes, whereas the  $\nu_1$  band is located at 1080 cm<sup>-1</sup>, which provides further support for the assumption that the particles are indeed ACC.<sup>13</sup>

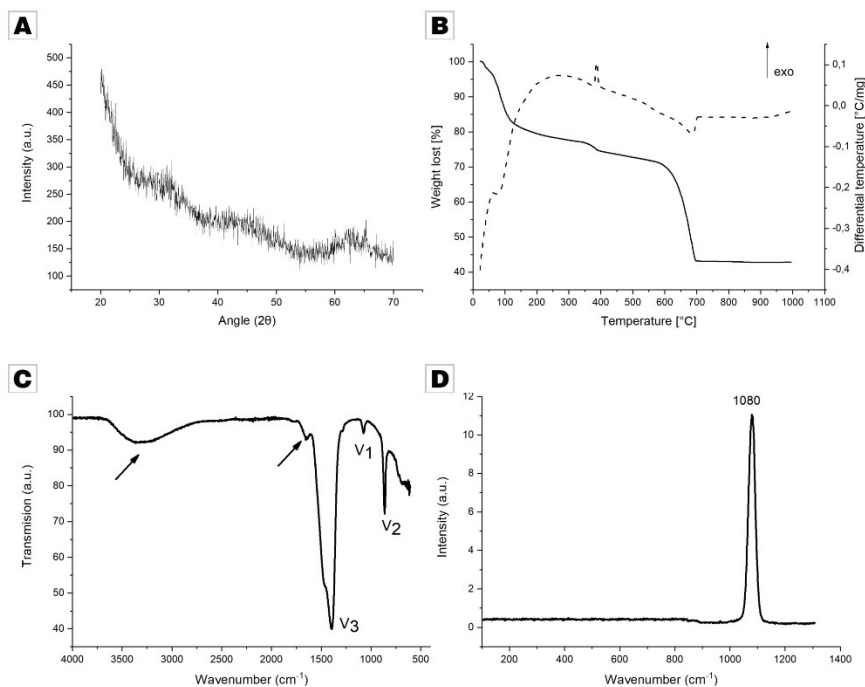

**Figure D1. Characterization of synthesized amorphous calcium carbonate (ACC).** (A) X-ray diffraction, (B) TGA/DTA analysis, (C) ATR/FT-IR spectroscopy, and (D) Raman spectroscopy.

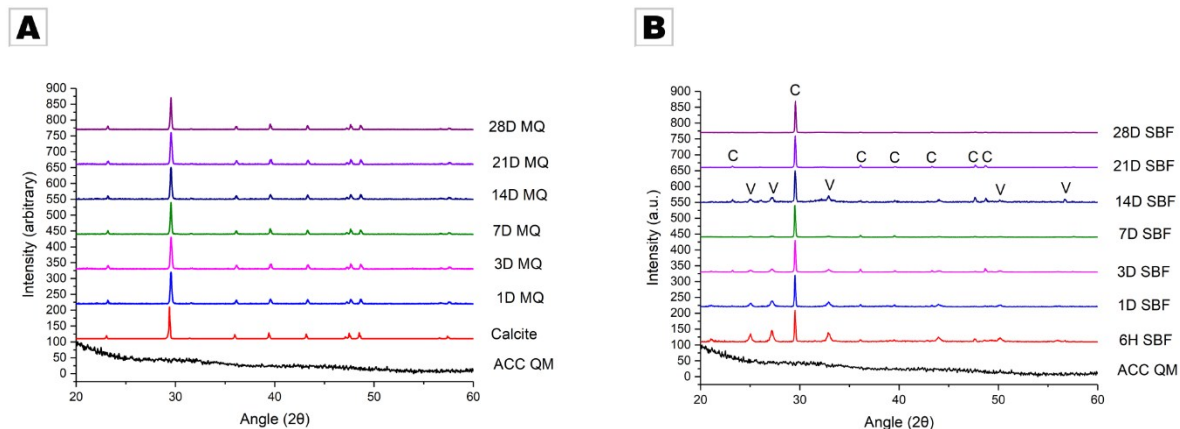

**Figure D2.** Evolution of X-ray diffractograms of ACC before/during incubation (A) in water and (B) in SBF for a time period of up to 28 d. Already after 1 d, only calcite is detectable.

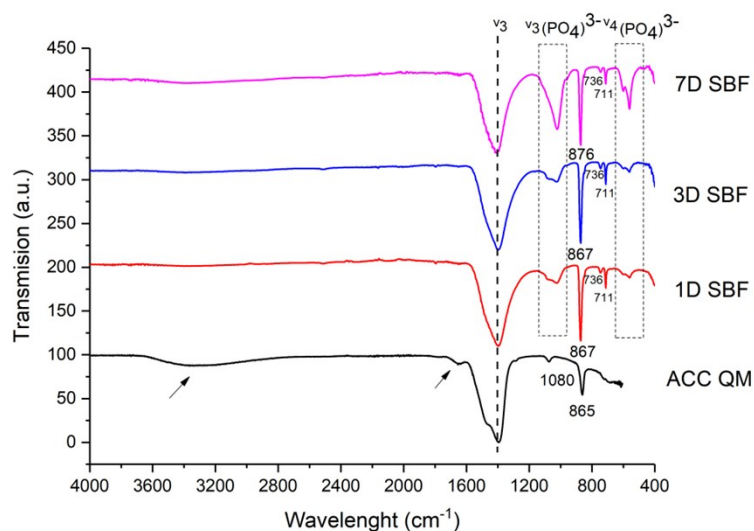

**Figure D3.** Evolution of ATR/FT-IR spectra of ACC before/during incubation in SBF for a time period of up to 7 d. Upon immersion, characteristic bands of calcite appear; already after 1 d absorption bands typical for phosphate appear. Arrows mark the broad absorption peak between 3000 and 3600  $\text{cm}^{-1}$  (O–H stretching) and a sharper band at 1632  $\text{cm}^{-1}$  (O–H bending) which are assigned to water structurally bound in ACC.

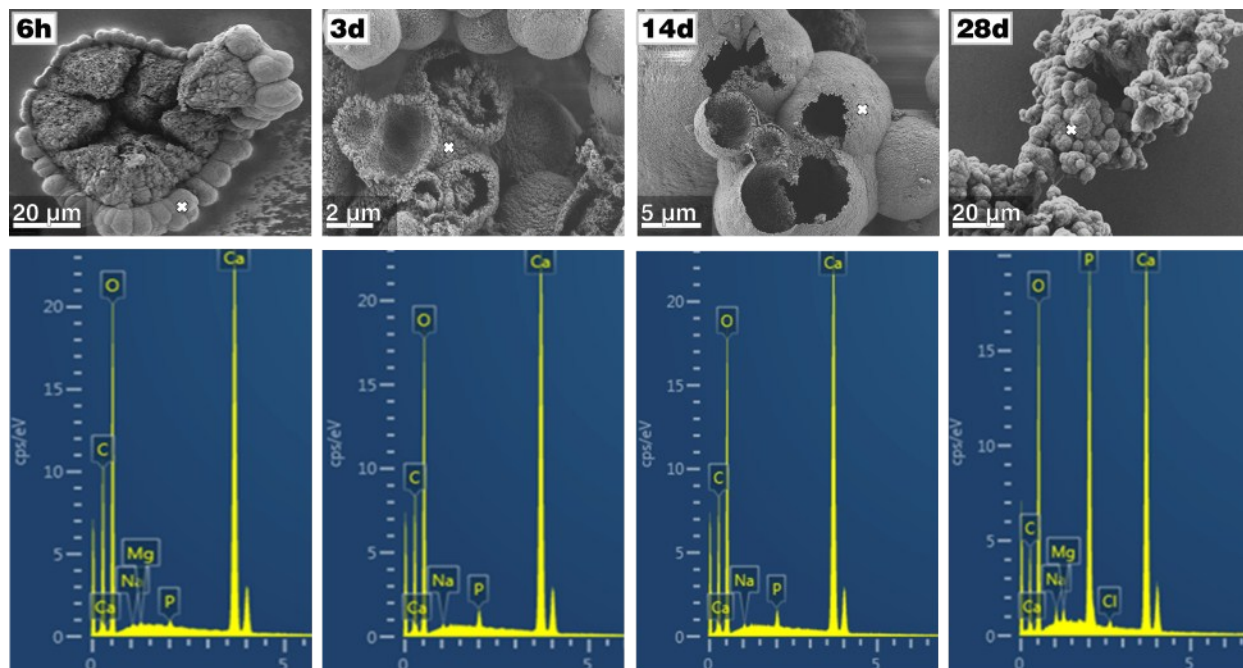

**Figure D.4. EDS analysis of hollow-sphere morphologies formed during incubation of ACC in SBF solution.** Already after 6 h, signals of phosphorus are detectable.

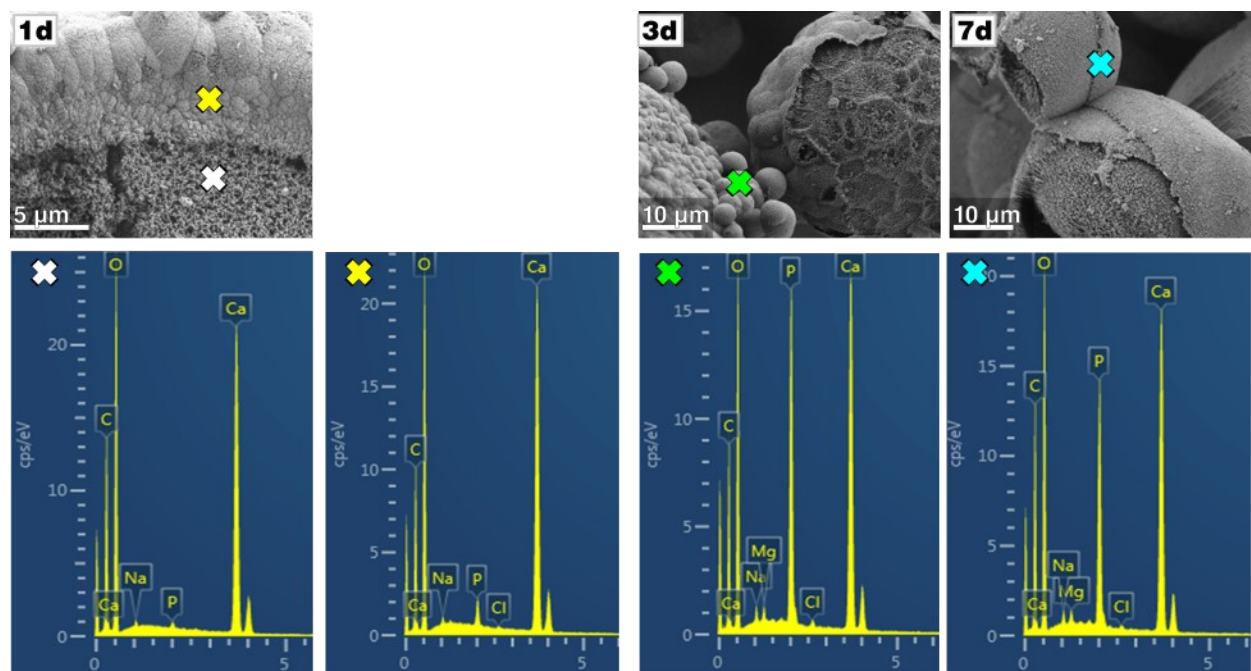

**Figure D5. SEM micrographs and EDS analysis of hollow-sphere morphologies formed during incubation of ACC in 10x mSBF solution.** Already after 6 h, signals of phosphorus are detectable.

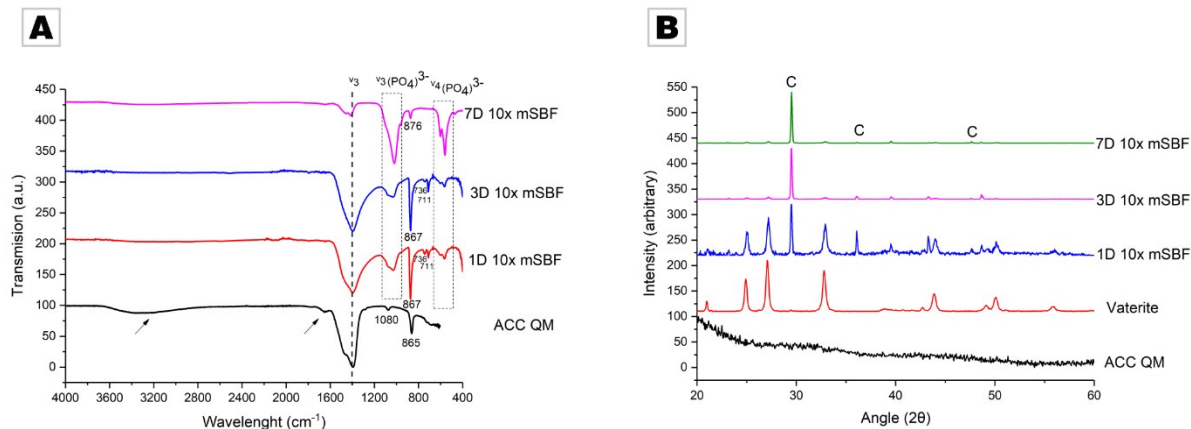

**Figure D6. (A) ATR/FTIR spectra and (B) X-ray diffractograms of ACC before/after incubation in 10xSBF for a time period of up to 7 d.** After 1 d, signals of vaterite and calcite are present; after 3 d, only calcite is detectable. After one day of immersion, the IR spectra show absorption bands of phosphate appear, i.e., anti-symmetry stretch vibration ( $\nu_3$ ) at 1029 cm<sup>-1</sup> and in-plane bending ( $\nu_4$ ) at 601 and 563 cm<sup>-1</sup>. Arrows indicate the broad absorption peak between 3000 and 3600 cm<sup>-1</sup> (O–H stretching) and a sharper band at 1632 cm<sup>-1</sup> (O–H bending) which are assigned to water structurally bound in ACC.

**Table D7. Ion content of Ca<sup>2+</sup>, Mg<sup>2+</sup> and Na<sup>+</sup> in the different Mg-ACC powders, as determined by ICP-MS.**

| Sample   | wt% Mg | wt% Ca | wt% Na |
|----------|--------|--------|--------|
| ACC_10Mg | 0.87   | 31     | 0.8    |
| ACC_20Mg | 2.6    | 29     | 1      |
| ACC_40Mg | 5.7    | 32     | 0.7    |

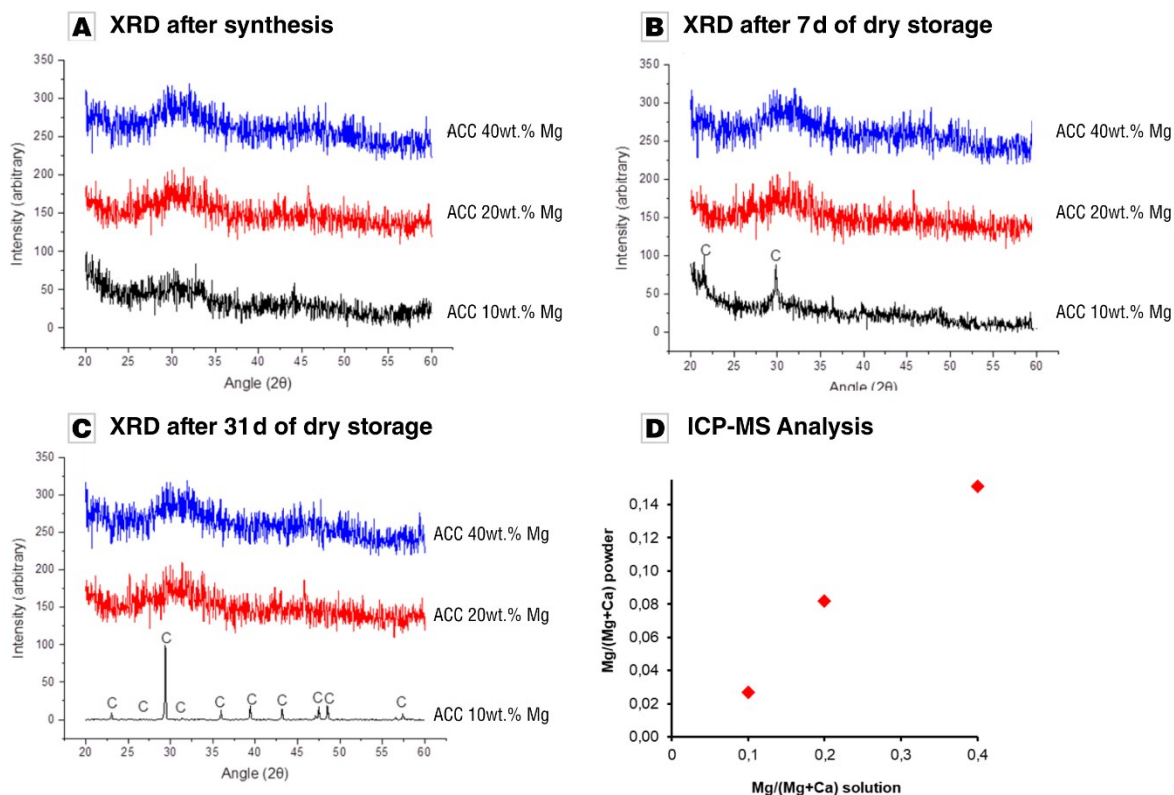

**Figure D8. Analysis of Mg-doped ACC. (A-C) X-ray diffractograms of Mg-doped ACC (synthesized with 10, 20, 40 wt% Mg), stored under dry conditions for a time period of up to 31 d. After 7 days of storage the sample with 10 wt% magnesium addition slowly starts to recrystallize to calcite, samples with 20 and 40 wt% magnesium addition after 31 days of storage are still fully amorphous. (D) Weight ratio Mg/(Mg + Ca) in the precipitated ACC powders as determined by ICP-OES, plotted against the ratio Mg/(Mg + Ca) in the starting solution.**
